# Supplementary material
Source: publisher site journal article supplement (https://www.dovepress.com/article/437110)
Supplement: Supplementary file 1 [file get_supplementary_file.php]

Table S1 Clinical pathological features

| Clinicopathological parameter | Normal (n=30) | Sepsis  (n=35) | t/χ2 | p Value |
| --- | --- | --- | --- | --- |
| Age (years) | 9.3±4.9 | 8.8±4.6 | -0.394 | 0.694 |
| Gender Male | 17 | 15 | 0.741 | 0.389 |
| Female | 13 | 20 |  |  |
| PCT | 1.8±4.9 | 19.9±32.2 | -3.268 | 0.002 |
| WBC | 13.9±6.8 | 14.5±12.1 | -0.247 | 0.807 |
| CRP | 3.8±4.1 | 23.7±37.1 | -3.139 | 0.003 |
| NEU% | 7.6±3.4 | 11.4±4.5 | -3.835 | 0.000 |
| Organ failure Yes | 0 (0) | 4 (11.4%) |  |  |
| No | 30 (100%) | 31 (88.6%) | 1.942 | 0.163 |
| Length of stay at intensive care units (days) | 0 | 3.4±3.5 | -21.455 | 0.000 |

Table. S2 The sequences of the qRT-PCR primers.

| Gene | Forward primer | Reverse primer |
| --- | --- | --- |
| STOM | CACACACGGGACTCCGAAG | ATGAGAACGCCACCAAAATCC |
| VNN1 | GACCCCAGTACAAGAAAGACTCA | TCAGGCTCCTTGGGTACATTG |
| SORT1 | AAGTCTTTGGACCGACATCTCT | AGCACGCTTGTTATGTAGACG |
| RETN | CTGTTGGTGTCTAGCAAGACC | CCAATGCTGCTTATTGCCCTAAA |
| β-ACTIN | CGTGGGCCGCCCTAGGCACCA | TTGGCTTAGGGTTCAGGGGGG |
